# Supplementary material for: Hot-Melt Extrusion Process Fluctuations and Their Impact on Critical Quality Attributes of Filaments and 3D-Printed Dosage Forms
Source: MDPI journal article supplement (doi:10.3390/pharmaceutics12060511), 2020-06-03
Supplement: s1 [file s1]

# Supplementary Material: Hot-Melt Extrusion Process Fluctuations and their Impact on Critical Quality Attributes of Filaments and 3D-printed Dosage Forms

Hanna Ponsar, Raphael Wiedey and Julian Quodbach \*

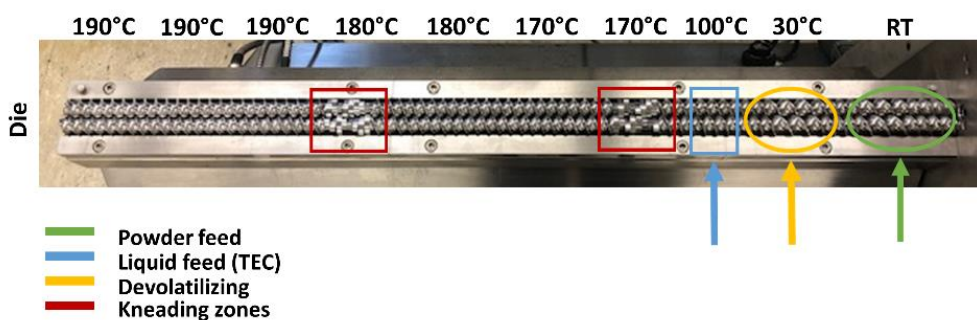

Figure S1. Screw- and temperature configuration and barrel sections (RT = room temperature).
